# Supplementary material for: Taxonomic relevance of leaf surface micromorphology in Korean Clematis L. (Ranunculaceae)
Source: PeerJ journal article supplement (doi:10.7717/peerj.17997), 2024-09-10
Supplement: Raw_data_of_table_1.xlsx [file Raw_data_of_table_1.xlsx]

## Sheet: Sheet1
Species	C. koreana									C. apiifolia										C. brachyura									C. bravicaudata
	No. stomata (0.5mm x 0.5mm)	No of stm. (1mm x 1mm)	Stm. L (mm)	um	Stm W (mm)	um	SA mm2)	um2		No. stomata		Stm. L		Stm W		SA (mm2)				No. stomata		Stm. L		Stm W		SA (mm2)			No. stomata		Stm. L		Stm W		SA
	14	28	0.041	41	0.033	33	0.001353	1353		31	62	0.04	40	0.024	24	0.00096	960			27	54	0.036	36	0.025	25	0.0009	900		38	76	0.04	40	0.028	28	0.00112
	15	30	0.048	48	0.031	31	0.001488	1488		29	58	0.037	37	0.025	25	0.000925	925			32	64	0.031	31	0.023	23	0.000713	713		42	84	0.037	37	0.029	29	0.001073
	15	30	0.043	43	0.031	31	0.001333	1333		29	58	0.033	33	0.024	24	0.000792	792			28	56	0.035	35	0.025	25	0.000875	875		32	64	0.043	43	0.029	29	0.001247
	14	28	0.04	40	0.032	32	0.00128	1280		28	56	0.038	38	0.026	26	0.000988	988			27	54	0.032	32	0.025	25	0.0008	800		33	66	0.04	40	0.029	29	0.00116
	13	26	0.041	41	0.03	30	0.00123	1230		28	56	0.039	39	0.023	23	0.000897	897			30	60	0.031	31	0.025	25	0.000775	775		36	72	0.036	36	0.027	27	0.000972
	12	24	0.045	45	0.035	35	0.001575	1575		32	64	0.035	35	0.024	24	0.00084	840			32	64	0.037	37	0.026	26	0.000962	962		35	70	0.043	43	0.031	31	0.001333
	14	28	0.044	44	0.037	37	0.001628	1628		29	58	0.042	42	0.026	26	0.001092	1092			26	52	0.039	39	0.028	28	0.001092	1092		32	64	0.037	37	0.03	30	0.00111
	18	36	0.041	41	0.035	35	0.001435	1435		36	72	0.035	35	0.021	21	0.000735	735			28	56	0.034	34	0.026	26	0.000884	884		29	58	0.04	40	0.028	28	0.00112
	16	32	0.036	36	0.029	29	0.001044	1044		35	70	0.034	34	0.022	22	0.000748	748			32	64	0.032	32	0.023	23	0.000736	736		41	82	0.036	36	0.026	26	0.000936
	18	36	0.045	45	0.031	31	0.001395	1395		38	76	0.034	34	0.024	24	0.000816	816			30	60	0.034	34	0.026	26	0.000884	884		43	86	0.045	45	0.028	28	0.00126
	21	42	0.041	41	0.029	29	0.001189	1189		40	80	0.032	32	0.021	21	0.000672	672			29	58	0.042	42	0.027	27	0.001134	1134		44	88	0.04	40	0.03	30	0.0012
	18	36	0.046	46	0.034	34	0.001564	1564		43	86	0.042	42	0.022	22	0.000924	924			29	58	0.039	39	0.026	26	0.001014	1014		40	80	0.042	42	0.03	30	0.00126
	20	40	0.04	40	0.025	25	0.001	1000		40	80	0.043	43	0.021	21	0.000903	903			28	56	0.032	32	0.023	23	0.000736	736		30	60	0.043	43	0.023	23	0.000989
	15	30	0.046	46	0.028	28	0.001288	1288		46	92	0.038	38	0.023	23	0.000874	874			30	60	0.039	39	0.028	28	0.001092	1092		43	86	0.043	43	0.029	29	0.001247
	14	28	0.044	44	0.028	28	0.001232	1232		48	96	0.037	37	0.023	23	0.000851	851			32	64	0.035	35	0.027	27	0.000945	945		35	70	0.046	46	0.028	28	0.001288
	13	26	0.044	44	0.032	32	0.001408	1408		32	64	0.037	37	0.022	22	0.000814	814			30	60	0.038	38	0.024	24	0.000912	912		31	62	0.043	43	0.029	29	0.001247
	15	30	0.042	42	0.031	31	0.001302	1302		33	66	0.035	35	0.021	21	0.000735	735			31	62	0.036	36	0.025	25	0.0009	900		27	54	0.041	41	0.029	29	0.001189
	16	32	0.045	45	0.031	31	0.001395	1395		33	66	0.035	35	0.022	22	0.00077	770			26	52	0.026	26	0.03	30	0.00078	780		28	56	0.043	43	0.031	31	0.001333
	12	24	0.044	44	0.036	36	0.001584	1584		32	64	0.037	37	0.022	22	0.000814	814			26	52	0.03	30	0.024	24	0.00072	720		30	60	0.031	31	0.025	25	0.000775
	14	28	0.039	39	0.028	28	0.001092	1092		28	56	0.04	40	0.024	24	0.00096	960			27	54	0.033	33	0.027	27	0.000891	891		34	68	0.037	37	0.028	28	0.001036
Maximum		42	0.048	48	0.037	37	0.001628	1628		48	96	0.043	43	0.026	26	0.001092	1092			32	64	0.042	42	0.03	30	0.001134	1134		44	88	0.046	46	0.031	31	0.001333
Minimum		24	0.036	36	0.025	25	0.001	1000		28	56	0.032	32	0.021	21	0.000672	672			26	52	0.026	26	0.023	23	0.000713	713		27	54	0.031	31	0.023	23	0.000775
Average		30.7	0.04275	42.75	0.0313	31.3	0.00134075	1340.75		34.5	69	0.03715	37.15	0.023	23	0.0008555	855.5			29	58	0.03455	34.55	0.02565	25.65	0.00088725	887.25		35.15	70.3	0.0403	40.3	0.02835	28.35	0.00114475
STD		4.99579	0.00288143		0.00306251	3.06251	0.000178992	178.992		6.13446	12.2689	0.00311659	3.11659	0.00158944	1.58944	0.00010261	102.61			2.12751	4.25503	0.00383165	3.83165	0.0018432	1.8432	0.00012704	127.04		5.46062	10.9212	0.00368639	3.68639	0.00195408	1.95408	0.000146605
	C. calcicola									C. fusca										C. fusca var. koreana									C. fusca var. violaceae
	No. of Stm		L		W		SA (um2)			No. of Stm		L		W		SA (um2)				No. of Stm		L		W		SA (um2)			No. of Stm		L		W		SA
	13	26	0.052	52	0.036	36	1872			27	54	0.038	38	0.027	27	1026				29	58	0.04	40	0.038	38	1520			29	58	0.036	36	0.026	26	936
	16	32	0.053	53	0.037	37	1961			28	56	0.04	40	0.029	29	1160				28	56	0.045	45	0.031	31	1395			33	66	0.041	41	0.028	28	1148
	15	30	0.054	54	0.033	33	1782			28	56	0.04	40	0.03	30	1200				26	52	0.044	44	0.031	31	1364			37	74	0.037	37	0.027	27	999
	14	28	0.047	47	0.032	32	1504			23	46	0.036	36	0.026	26	936				24	48	0.042	42	0.03	30	1260			38	76	0.039	39	0.028	28	1092
	12	24	0.046	46	0.036	36	1656			22	44	0.042	42	0.028	28	1176				22	44	0.042	42	0.034	34	1428			37	74	0.04	40	0.027	27	1080
	13	26	0.047	47	0.032	32	1504			20	40	0.042	42	0.034	34	1428				25	50	0.044	44	0.034	34	1496			38	76	0.036	36	0.023	23	828
	13	26	0.05	50	0.038	38	1900			24	48	0.044	44	0.03	30	1320				23	46	0.034	34	0.03	30	1020			32	64	0.043	43	0.027	27	1161
	10	20	0.05	50	0.033	33	1650			25	50	0.044	44	0.035	35	1540				23	46	0.042	42	0.032	32	1344			29	58	0.039	39	0.028	28	1092
	14	28	0.047	47	0.036	36	1692			24	48	0.042	42	0.032	32	1344				21	42	0.041	41	0.031	31	1271			32	64	0.04	40	0.032	32	1280
	13	26	0.044	44	0.032	32	1408			23	46	0.041	41	0.032	32	1312				22	44	0.042	42	0.03	30	1260			39	78	0.036	36	0.028	28	1008
	14	28	0.046	46	0.032	32	1472			21	42	0.039	39	0.033	33	1287				21	42	0.043	43	0.031	31	1333			38	76	0.038	38	0.027	27	1026
	15	30	0.045	45	0.037	37	1665			24	48	0.045	45	0.034	34	1530				24	48	0.043	43	0.035	35	1505			44	88	0.034	34	0.028	28	952
	16	32	0.051	51	0.034	34	1734			25	50	0.043	43	0.032	32	1376				25	50	0.042	42	0.033	33	1386			41	82	0.034	34	0.026	26	884
	16	32	0.05	50	0.034	34	1700			27	54	0.039	39	0.034	34	1326				27	54	0.043	43	0.034	34	1462			39	78	0.041	41	0.026	26	1066
	15	30	0.056	56	0.04	40	2240			26	52	0.043	43	0.034	34	1462				24	48	0.042	42	0.028	28	1176			43	86	0.039	39	0.024	24	936
	13	26	0.048	48	0.038	38	1824			25	50	0.045	45	0.037	37	1665				23	46	0.042	42	0.03	30	1260			44	88	0.032	32	0.024	24	768
	13	26	0.048	48	0.038	38	1824			20	40	0.044	44	0.032	32	1408				25	50	0.04	40	0.032	32	1280			39	78	0.039	39	0.025	25	975
	12	24	0.048	48	0.035	35	1680			22	44	0.042	42	0.031	31	1302				22	44	0.042	42	0.032	32	1344			34	68	0.039	39	0.027	27	1053
	13	26	0.045	45	0.034	34	1530			23	46	0.042	42	0.036	36	1512				22	44	0.043	43	0.03	30	1290			36	72	0.034	34	0.026	26	884
	12	24	0.042	42	0.032	32	1344			25	50	0.04	40	0.035	35	1400				21	42	0.039	39	0.032	32	1248			40	80	0.04	40	0.03	30	1200
Maximum	16	32	0.056	56	0.04	40	2240			28	56	0.045	45	0.037	37	1665				29	58	0.045	45	0.038	38	1520			44	88	0.043	43	0.032	32	1280
Minimum	10	20	0.042	42	0.032	32	1344			20	40	0.036	36	0.026	26	936				21	42	0.034	34	0.028	28	1020			29	58	0.032	32	0.023	23	768
Average	13.6	27.2	0.04845	48.45	0.03495	34.95	1697.1			24.1	48.2	0.04155	41.55	0.03205	32.05	1335.5				23.85	47.7	0.04175	41.75	0.0319	31.9	1332.1			37.1	74.2	0.03785	37.85	0.02685	26.85	1018.4
STD	1.56945	3.13889	0.00354631	3.54631	0.0025021	2.5021	210.714			2.40394	4.80789	0.0024165	2.4165	0.00299956	2.99956	176.129				2.32322	4.64645	0.00231414	2.31414	0.00226878	2.26878	121.17			4.45917	8.91834	0.00287045	2.87045	0.002059	2.059	128.171
	C. pseudotubulosa									C. hexapetala										C. ochotensis									C. patens
	No stm.		L		W					No stm.		L		W						No stm.		L		W		SA			No stm.		L		W		SA
	28	56	0.044	44	0.028	28	1232			31	62	0.041	41	0.031	31	1271				28	56	0.041	41	0.027	27	1107			20	40	0.04	40	0.029	29	1160
	24	48	0.043	43	0.029	29	1247			34	68	0.035	35	0.028	28	980				21	42	0.038	38	0.03	30	1140			22	44	0.043	43	0.029	29	1247
	30	60	0.032	32	0.024	24	768			32	64	0.043	43	0.033	33	1419				20	40	0.042	42	0.027	27	1134			22	44	0.032	32	0.026	26	832
	27	54	0.047	47	0.03	30	1410			34	68	0.043	43	0.032	32	1376				21	42	0.038	38	0.027	27	1026			22	44	0.043	43	0.033	33	1419
	31	62	0.052	52	0.033	33	1716			36	72	0.04	40	0.029	29	1160				18	36	0.04	40	0.025	25	1000			23	46	0.044	44	0.031	31	1364
	31	62	0.05	50	0.03	30	1500			32	64	0.039	39	0.029	29	1131				21	42	0.033	33	0.026	26	858			19	38	0.04	40	0.029	29	1160
	24	48	0.043	43	0.027	27	1161			37	74	0.039	39	0.03	30	1170				20	40	0.038	38	0.028	28	1064			18	36	0.039	39	0.032	32	1248
	25	50	0.036	36	0.029	29	1044			39	78	0.038	38	0.029	29	1102				23	46	0.04	40	0.028	28	1120			22	44	0.04	40	0.033	33	1320
	20	40	0.05	50	0.031	31	1550			40	80	0.038	38	0.029	29	1102				23	46	0.038	38	0.027	27	1026			23	46	0.045	45	0.03	30	1350
	22	44	0.031	31	0.029	29	899			43	86	0.042	42	0.031	31	1302				24	48	0.04	40	0.029	29	1160			24	48	0.047	47	0.038	38	1786
	26	52	0.041	41	0.028	28	1148			40	80	0.038	38	0.029	29	1102				25	50	0.038	38	0.029	29	1102			25	50	0.046	46	0.035	35	1610
	25	50	0.05	50	0.027	27	1350			41	82	0.038	38	0.029	29	1102				20	40	0.035	35	0.028	28	980			24	48	0.042	42	0.033	33	1386
	24	48	0.036	36	0.028	28	1008			42	84	0.04	40	0.028	28	1120				22	44	0.048	48	0.032	32	1536			25	50	0.037	37	0.027	27	999
	26	52	0.044	44	0.03	30	1320			41	82	0.042	42	0.03	30	1260				18	36	0.043	43	0.028	28	1204			26	52	0.029	29	0.026	26	754
	24	48	0.045	45	0.028	28	1260			43	86	0.043	43	0.031	31	1333				27	54	0.037	37	0.032	32	1184			25	50	0.029	29	0.028	28	812
	28	56	0.047	47	0.031	31	1457			43	86	0.043	43	0.031	31	1333				23	46	0.039	39	0.029	29	1131			24	48	0.044	44	0.034	34	1496
	25	50	0.042	42	0.03	30	1260			36	72	0.033	33	0.029	29	957				24	48	0.043	43	0.029	29	1247			19	38	0.04	40	0.032	32	1280
	25	50	0.043	43	0.027	27	1161			45	90	0.041	41	0.024	24	984				22	44	0.033	33	0.028	28	924			18	36	0.043	43	0.033	33	1419
	20	40	0.041	41	0.026	26	1066			43	86	0.042	42	0.026	26	1092				21	42	0.038	38	0.031	31	1178			17	34	0.041	41	0.029	29	1189
	19	38	0.047	47	0.032	32	1504			45	90	0.041	41	0.027	27	1107				19	38	0.039	39	0.027	27	1053			19	38	0.029	29	0.026	26	754
Maximum	31	62	0.052	52	0.033	33	1716			45	90	0.043	43	0.033	33	1419				28	56	0.048	48	0.032	32	1536			26	52	0.047	47	0.038	38	1786
Minimum	19	38	0.031	31	0.024	24	768			31	62	0.033	33	0.024	24	957				18	36	0.033	33	0.025	25	858			17	34	0.029	29	0.026	26	754
Average	25.2	50.4	0.0432	43.2	0.02885	28.85	1253.05			38.85	77.7	0.03995	39.95	0.02925	29.25	1170.15				22	44	0.03905	39.05	0.02835	28.35	1108.7			21.85	43.7	0.03965	39.65	0.03065	30.65	1229.25
STD	3.39659	6.79319	0.00586336	5.86336	0.00213431	2.13431	233.339			4.52217	9.04434	0.00274293	2.74293	0.00207428	2.07428	134.171				2.69502	5.39005	0.00345612	3.45612	0.0018432	1.8432	139.607			2.75824	5.51648	0.00565941	5.65941	0.00329713	3.29713	282.354
	C. serratifolia									C. taeguensis										C. tubulosa									C. terniflora
	No stm.		L		W					No stm.		L		W		SA				No stm.		L		W		SA			No stm.		L		W		SA
	48	96	0.04	40	0.028	28	1120			42	84	0.034	34	0.025	25	850				22	44	0.041	41	0.033	33	1353			21	42	0.049	49	0.035	35	1715
	50	100	0.042	42	0.027	27	1134			41	82	0.032	32	0.02	20	640				20	40	0.037	37	0.022	22	814			19	38	0.045	45	0.037	37	1665
	51	102	0.045	45	0.029	29	1305			50	100	0.04	40	0.025	25	1000				23	46	0.039	39	0.027	27	1053			23	46	0.051	51	0.032	32	1632
	41	82	0.041	41	0.027	27	1107			46	92	0.035	35	0.024	24	840				21	42	0.039	39	0.024	24	936			23	46	0.05	50	0.033	33	1650
	40	80	0.044	44	0.029	29	1276			38	76	0.023	23	0.035	35	805				23	46	0.042	42	0.028	28	1176			21	42	0.049	49	0.033	33	1617
	45	90	0.039	39	0.026	26	1014			33	66	0.035	35	0.027	27	945				24	48	0.032	32	0.026	26	832			19	38	0.049	49	0.035	35	1715
	42	84	0.039	39	0.028	28	1092			34	68	0.036	36	0.025	25	900				25	50	0.041	41	0.03	30	1230			21	42	0.05	50	0.033	33	1650
	44	88	0.041	41	0.032	32	1312			36	72	0.041	41	0.028	28	1148				27	54	0.04	40	0.028	28	1120			19	38	0.044	44	0.033	33	1452
	48	96	0.032	32	0.02	20	640			34	68	0.036	36	0.026	26	936				21	42	0.042	42	0.025	25	1050			23	46	0.048	48	0.034	34	1632
	39	78	0.043	43	0.03	30	1290			37	74	0.034	34	0.026	26	884				20	40	0.047	47	0.024	24	1128			21	42	0.047	47	0.031	31	1457
	46	92	0.046	46	0.028	28	1288			37	74	0.03	30	0.023	23	690				22	44	0.04	40	0.024	24	960			19	38	0.05	50	0.032	32	1600
	40	80	0.041	41	0.028	28	1148			39	78	0.032	32	0.025	25	800				23	46	0.039	39	0.023	23	897			24	48	0.053	53	0.037	37	1961
	42	84	0.04	40	0.025	25	1000			42	84	0.038	38	0.025	25	950				24	48	0.043	43	0.023	23	989			26	52	0.045	45	0.033	33	1485
	44	88	0.04	40	0.022	22	880			44	88	0.034	34	0.025	25	850				19	38	0.046	46	0.02	20	920			24	48	0.046	46	0.032	32	1472
	43	86	0.039	39	0.022	22	858			45	90	0.04	40	0.026	26	1040				20	40	0.036	36	0.02	20	720			25	50	0.057	57	0.035	35	1995
	42	84	0.035	35	0.026	26	910			39	78	0.042	42	0.028	28	1176				22	44	0.04	40	0.019	19	760			26	52	0.05	50	0.036	36	1800
	47	94	0.044	44	0.027	27	1188			48	96	0.037	37	0.028	28	1036				23	46	0.034	34	0.024	24	816			28	56	0.049	49	0.036	36	1764
	40	80	0.037	37	0.029	29	1073			42	84	0.035	35	0.028	28	980				25	50	0.038	38	0.02	20	760			27	54	0.052	52	0.036	36	1872
	45	90	0.039	39	0.028	28	1092			40	80	0.042	42	0.027	27	1134				28	56	0.039	39	0.022	22	858			25	50	0.051	51	0.0335	33.5	1708.5
	43	86	0.047	47	0.028	28	1316			42	84	0.039	39	0.027	27	1053				22	44	0.033	33	0.025	25	825			24	48	0.047	47	0.036	36	1692
Maximum	51	102	0.047	47	0.032	32	1316			50	100	0.042	42	0.035	35	1176				28	56	0.047	47	0.033	33	1353			28	56	0.057	57	0.037	37	1995
Minimum	39	78	0.032	32	0.02	20	640			33	66	0.023	23	0.02	20	640				19	38	0.032	32	0.019	19	720			19	38	0.044	44	0.031	31	1452
Average	44	88	0.0407	40.7	0.02695	26.95	1102.15			40.45	80.9	0.03575	35.75	0.02615	26.15	932.85				22.7	45.4	0.0394	39.4	0.02435	24.35	959.85			22.9	45.8	0.0491	49.1	0.034125	34.125	1676.72
STD	3.4641	6.9282	0.00362883	3.62883	0.00287411	2.87411	180.718			4.67327	9.34654	0.00455233	4.55233	0.00285205	2.85205	144.032				2.34184	4.68368	0.00383062	3.83062	0.00358762	3.58762	174.149			2.80788	5.61577	0.00304181	3.04181	0.00182003	1.82003	152.126
	C. mandshurica									C. trichotoma										C. urticifolia
	No stm.		L		W		SA			No stm.		L		W		SA				No stm.		L		W		SA
	26	52	0.042	42	0.03	30	1260			13	26	0.039	39	0.034	34	1326				10	20	0.047	47	0.029	29	1363
	21	42	0.043	43	0.023	23	989			12	24	0.044	44	0.027	27	1188				9	18	0.043	43	0.028	28	1204
	24	48	0.039	39	0.026	26	1014			14	28	0.043	43	0.027	27	1161				10	20	0.05	50	0.03	30	1500
	20	40	0.043	43	0.032	32	1376			14	28	0.044	44	0.025	25	1100				11	22	0.044	44	0.03	30	1320
	22	44	0.037	37	0.027	27	999			11	22	0.043	43	0.026	26	1118				10	20	0.043	43	0.029	29	1247
	23	46	0.043	43	0.032	32	1376			12	24	0.047	47	0.03	30	1410				10	20	0.046	46	0.03	30	1380
	22	44	0.043	43	0.03	30	1290			14	28	0.048	48	0.031	31	1488				10	20	0.043	43	0.029	29	1247
	23	46	0.041	41	0.035	35	1435			16	32	0.044	44	0.027	27	1188				10	20	0.045	45	0.027	27	1215
	24	48	0.041	41	0.032	32	1312			17	34	0.044	44	0.028	28	1232				13	26	0.044	44	0.03	30	1320
	19	38	0.04	40	0.028	28	1120			18	36	0.046	46	0.03	30	1380				12	24	0.045	45	0.03	30	1350
	22	44	0.046	46	0.032	32	1472			19	38	0.045	45	0.025	25	1125				12	24	0.048	48	0.03	30	1440
	27	54	0.035	35	0.028	28	980			16	32	0.043	43	0.025	25	1075				12	24	0.048	48	0.027	27	1296
	26	52	0.048	48	0.028	28	1344			18	36	0.043	43	0.027	27	1161				9	18	0.045	45	0.028	28	1260
	21	42	0.043	43	0.027	27	1161			14	28	0.04	40	0.026	26	1040				10	20	0.041	41	0.025	25	1025
	23	46	0.044	44	0.03	30	1320			13	26	0.039	39	0.026	26	1014				12	24	0.045	45	0.027	27	1215
	23	46	0.042	42	0.032	32	1344			10	20	0.042	42	0.028	28	1176				9	18	0.045	45	0.029	29	1305
	21	42	0.037	37	0.028	28	1036			11	22	0.044	44	0.029	29	1276				10	20	0.04	40	0.03	30	1200
	21	42	0.043	43	0.032	32	1376			10	20	0.038	38	0.026	26	988				10	20	0.04	40	0.027	27	1080
	22	44	0.045	45	0.032	32	1440			10	20	0.043	43	0.027	27	1161				12	24	0.045	45	0.026	26	1170
	22	44	0.041	41	0.031	31	1271			13	26	0.045	45	0.026	26	1170				10	20	0.049	49	0.03	30	1470
	23	46	0.046	46	0.03	30	1380			14	28	0.042	42	0.027	27	1134				13	26	0.046	46	0.028	28	1288
Maximum	27	54	0.048	48	0.035	35	1472			19	38	0.048	48	0.034	34	1488				13	26	0.05	50	0.03	30	1500
Minimum	19	38	0.035	35	0.023	23	980			10	20	0.038	38	0.025	25	988				9	18	0.04	40	0.025	25	1025
Average	22.619	45.2381	0.042	42	0.0297619	29.7619	1252.14			13.7619	27.5238	0.0431429	43.1429	0.0274762	27.4762	1186.24				10.6667	21.3333	0.0448571	44.8571	0.0285238	28.5238	1280.71
STD	1.98686	3.97372	0.00317805	3.17805	0.00275508	2.75508	164.762			2.73687	5.47375	0.00255511	2.55511	0.00224987	2.24987	128.829				1.27802	2.55604	0.0026886	2.6886	0.00153685	1.53685	117.548
