# Supplementary material for: Taxonomic relevance of leaf surface micromorphology in Korean Clematis L. (Ranunculaceae)
Source: PeerJ journal article supplement (doi:10.7717/peerj.17997), 2024-09-10
Supplement: Supplementary_files.xlsx [file Supplementary_files.xlsx]

## Sheet: S1
S1. Character states used in the cluster and principle component analysis of Clematis taxa
SN	Characters	Cheater states
1	Eglandular trichome abundance in adaxial side	sparsely present (0)/moderately present (1)/abundantly present (2)
2	Eglandular trichome abundance in abaxial side	sparsely present (0)/moderately present (1)/abundantly present (2)
3	Eglandular trichome abundance in veins	sparsely present (0)/moderately present (1)/abundantly present (2)
4	Abundance of glandular trichomes	absent to rarely present (0); abundantly present
5	Epidermal cell boundary adaxial	only undulate (0)/Omega or U-shaped (1)/straight and undulate (2)/ all types (straight, Omega or U-shaped and undulate) (3)
6	Epidermal cell boundary abaxial	straight and undulate (0)/Omega or U-shaped (1)
7	Number of epidermal cells connected with subsidiary cells	minimum number: 3(0)/4(1)/5(2)
8	Cuticular striations	absent (0)/feebly noticeable (1)/fairly noticeable (2)
9	Wax	absent (0)/present (1)
10	Stomata length	less than 40µm (0)/more than 40um (1)
11	Stomata width	less than 30µm (0)/more than 30um (1)
12	Stomata area	less than 1000µm2 (0)/1001-1500µm2 (1)/more than 1500 µm2 (2)
13	Stomata density	less than 40 (0)/40-60 (1)/more than 60 (2)

## Sheet: S2
S2
The character states and their coding
Name of taxa	ETadS	ETabS	ETV	GT	ECBad	ECBab	ECSC	CS	Wax	SL	SW	SA	SD
C. apiifolia	1	1	2	0	0	0	1,	1	0	0	0	0	2
C. brevicaudata	1	0	1	0	1	1	1,	2	0	1	0	1	2
C. trichotoma	1	1	1	0	1	1	0	0	0	1	0	1	0
C. taeguensis	1	1	1	0	1	1	1	0	0	0	0	0	2
C. hexapetala	0	0	1	1	2	0	0	1	1	0	0	1	2
C. terniflora	0	0	1	0	1	1	1	2	1	1	1	2	1
C. mandshurica	0	0	0	1	1	1	1	1	1	1	0	1	1
C. tubulosa	2	2	2	0	1	0	1	0	0	1	0	1	1
C. urticifolia	1	1	2	0	1	1	1	1	0	1	0	1	0
C. pseudotubulosa	1	1	2	0	1	0	2	0	0	0	0	0	1
C. patens	0	0	2	0	1	1	1	2	0	0	1	1	1
C. brachyura	0	0	1	0	1	1	1	0	1	0	0	0	1
C. serratifolia	0	0	0	0	1	0	1	1	0	1	0	1	2
C. fusca var. fusca	0	0	0	0	3	1	1	1	1	1	1	1	1
C. fusca var. flabellata	0	0	1	0	3	1	1	1	1	1	1	1	1
C. fusca var. violacea	1	0	1	0	3	0	1	1	1	0	0	1	2
C. calcicola	0	0	0	1	3	0	1	2	1	1	1	2	0
C. koreana	1	0	2	0	1	1	2	2	0	1	1	1	0
C. ochotensis	0	0	1	0	1	1	1	2	1	0	0	1	1
